# Supplementary material for: Design and synthesis of Ga-doped ZSM-22 zeolites as highly selective and stable catalysts forn-dodecane isomerization
Source: Royal Society of Chemistry journal article supplement (doi:10.1039/c9cy00414a), 2019-01-01
Supplement: c9cy00414a1.pdf [file c9cy00414a1.pdf]

## Supplementary Information

### Design and synthesis of Ga-doped ZSM-22 zeolites as highly selective and stable catalyst for n-dodecane isomerization

**Suyao Liu,<sup>a, b</sup> # Yurong He,<sup>a, c</sup> # Huaike Zhang,<sup>a, b</sup> Zhiqiang Chen,<sup>a, c</sup> Enjing Lv,<sup>b</sup> Jie Ren,<sup>a, b</sup> \*  
Yifeng Yun,<sup>b, d</sup> Xiaodong Wen,<sup>a, b</sup> Yong-Wang Li<sup>a, b</sup> \***

<sup>a</sup> State Key Laboratory of Coal Conversion, Institute of Coal Chemistry, Chinese Academy of Sciences, Taiyuan 030001, PR China

<sup>b</sup> National Energy Center for Clean Fuels, Synfuels CHINA Co., Ltd, Beijing, 101400, PR China

<sup>c</sup> University of Chinese Academy of Sciences, Beijing 100049, PR China

<sup>d</sup> Inner Mongolia Yitai CTO Co., Ltd., Ordos, Inner Mongolia, 010321, PR China

# These authors contributed equally to this work.

\* Corresponding author. Tel.: +86 010 6966 7855. E-mail address: renjie@sxicc.ac.cn (J. Ren).

Tel.: +86 010 6966 7788. E-mail address: ywl@sxicc.ac.cn (Y. Li).

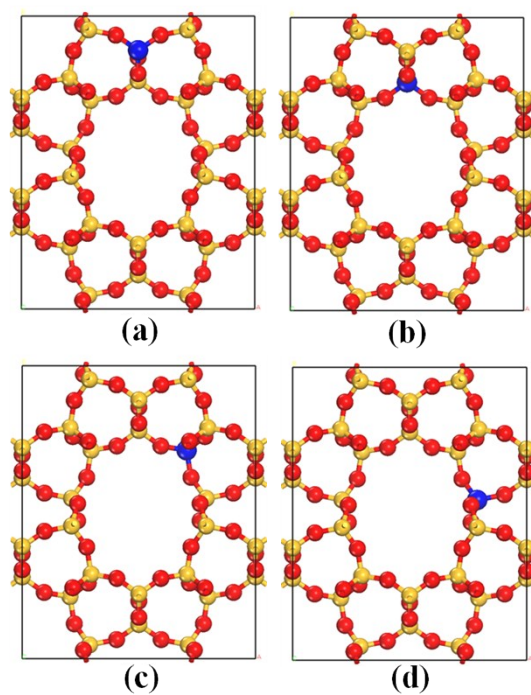

**Fig. S1** The schematic views of the unit cells of ZSM-22 with the four independent positions, (a) T4, (b) T3, (c) T2, and (d) T1, shown with blue (the red and yellow balls represent for the O and Si atoms, respectively).

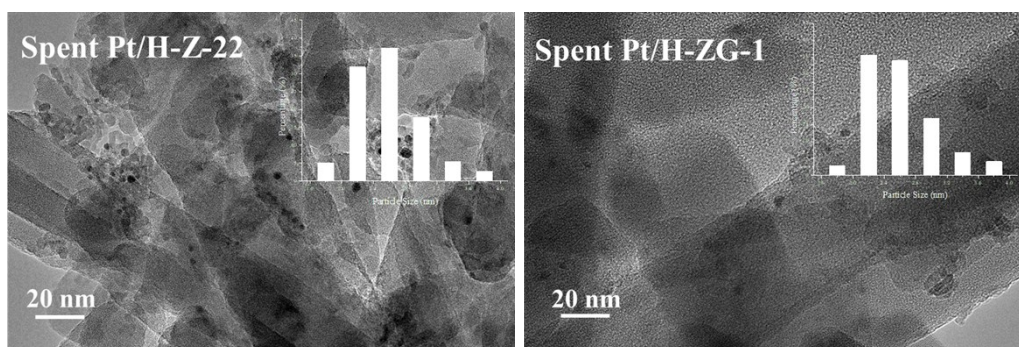

**Fig. S2** TEM images of representative bifunctional catalysts after n-C<sub>12</sub> isomerization.

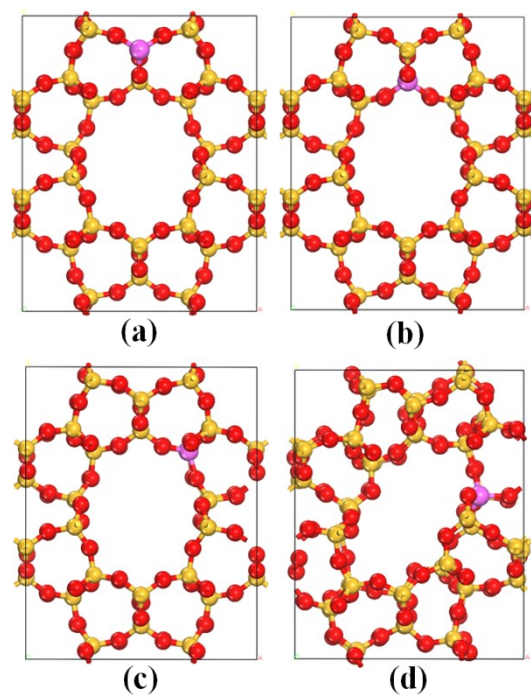

**Fig. S3** The structures of the Al substituted ZSM-22 unit cells at the (a) T4, (b) T3, (c) T2, and (d) T1 positions (the red, yellow, and purple balls represent for the O, Si, and Al atoms, respectively).

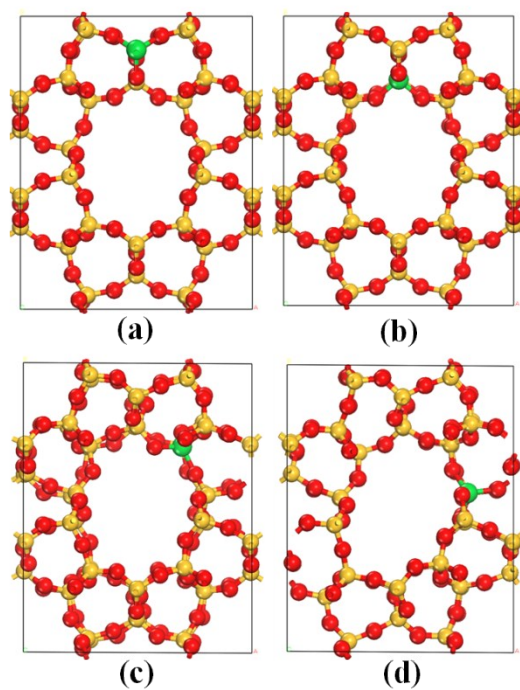

**Fig. S4** The structures of the Ga substituted ZSM-22 unit cells at the (a) T4, (b) T3, (c) T2, and (d) T1 positions (the red, yellow, and green balls represent for the O, Si, and Fe atoms, respectively).

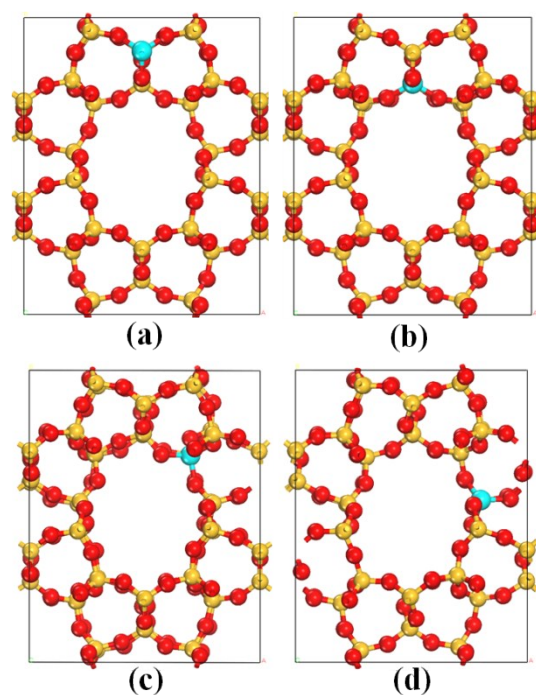

**Fig. S5** The structures of the Fe substituted ZSM-22 unit cells at the (a) T4, (b) T3, (c) T2, and (d) T1 positions (the red, yellow, and cyan balls represent for the O, Si, and Fe atoms, respectively).

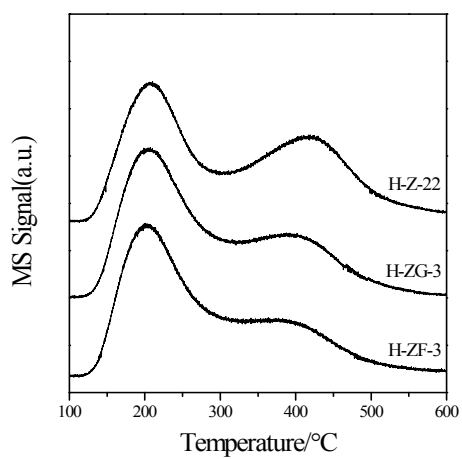

**Fig. S6** NH<sub>3</sub>-TPD spectra of H-Z-22, H-ZG-3, and H-ZF-3 samples  
(Content of Fe and Ga is 0.76 wt. % and 0.79 wt. % as determined by ICP-AES, respectively.)

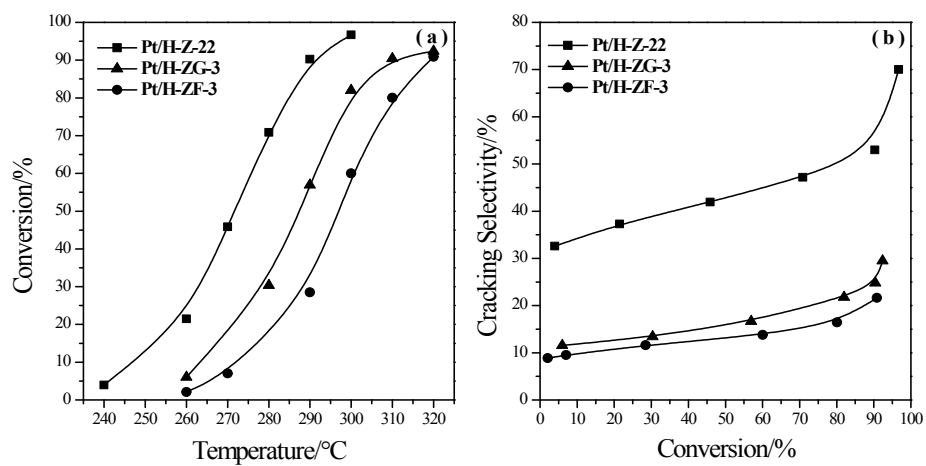

**Fig. S7** n-dodecane conversion (a) and cracking selectivity (b) over Pt/H-Z-22, Pt/H-ZG-3, and Pt/H-ZF-3 catalysts

(Reaction condition:  $H_2/n\text{-dodecane}=600$ ,  $LHSV=2.0\text{ h}^{-1}$ ,  $P=2.0\text{ MPa}$ )



---

**Table S1** Acidity of Fe- and Ga-doped samples determined by Py-FTIR spectra

| Samples | Acidity types ( $\mu\text{mol/g}$ ) |        |              |        |
|---------|-------------------------------------|--------|--------------|--------|
|         | B acid sites                        |        | L acid sites |        |
|         | 200 °C                              | 350 °C | 200 °C       | 350 °C |
| H-Z-22  | 104                                 | 88     | 79           | 24     |
| H-ZF-3  | 79                                  | 65     | 73           | 22     |
| H-ZG-3  | 89                                  | 75     | 73           | 20     |

---

**Table S2** Crystallinity and textual properties of protonic samples treated at the same conditions

| Sample         | Cryst. <sup>a</sup><br>(%) | Surface area (m <sup>2</sup> /g) |                  |                  | Micropore volume<br>(cm <sup>3</sup> /g) |
|----------------|----------------------------|----------------------------------|------------------|------------------|------------------------------------------|
|                |                            | S <sub>BET</sub>                 | S <sub>mic</sub> | S <sub>ext</sub> |                                          |
| Fresh H-ZG-3   | 91                         | 211.8                            | 132.2            | 79.6             | 0.25                                     |
| Fresh H-ZF-3   | 90                         | 192.4                            | 105.1            | 87.3             | 0.22                                     |
| Treated H-ZG-3 | 88                         | 205.9                            | 128.7            | 77.2             | 0.23                                     |
| Treated H-ZF-3 | 64                         | 145.8                            | 72.2             | 73.6             | 0.16                                     |

<sup>a</sup> Calculated from XRD.
